# Supplementary material for: Recessive pathogenic variants in MCAT cause combined oxidative phosphorylation deficiency
Source: bioRxiv or medRxiv preprint supplement (doi:10.1101/2022.12.06.22283173), 2022-12-09
Supplement: Supplementary file [file media-1.pdf]

**Supplemental Table S1. Absence of Heterozygosity (AOH) identified on chromosomal microarray**

| <b>AOH Region [GRCh37]</b>       | <b>Size (bp)</b> | <b>No. of genes</b> |
|----------------------------------|------------------|---------------------|
| 1p32.3p32.2(52407782_57646055)   | 5,238,274        | 107                 |
| 1q41q42.12(219978259_226762648)  | 6,784,390        | 109                 |
| 2q23.3q24.1(150509332_155344473) | 4,835,142        | 37                  |
| 9p24.1p23(7068436_9752968)       | 2,684,533        | 11                  |
| 9q21.31q21.32(81625681_84241442) | 2,615,762        | 23                  |
| 22q12.3q13.31(36074596_46172372) | 10,097,777       | 292                 |
